# Supplementary material for: Comparative MicroRNA Expression Profiles of Cynomolgus Monkeys, Rat, and Human Reveal that miR-182 Is Involved in T2D Pathogenic Processes
Source: J Diabetes Res. 2014 Nov 4;2014:760397. doi: 10.1155/2014/760397 (PMC4235598; doi:10.1155/2014/760397)
Supplement: Supplementary file 1 — Table S1. The detailed information of the reads filtering and mapping. Table S2. The miRNA expression profile. Table S3. The fold change value and P-value of the filtered miRNAs in the four comparisons. Table S4. The references and specific expressed tissues of the valid target genes of miR-182. [file 760397.f1.zip]

Archive with 4 entries (4 files):
- Table S1. The reads filter and mapping information.xls
- Table S2. The miRNA expression profile.xls
- Table S3. The details of the filtered miRNAs.xls
- Table S4. The summarization of the valid target genes of miR-182.doc
