# Supplementary material for: Comparative MicroRNA Expression Profiles of Cynomolgus Monkeys, Rat, and Human Reveal that miR-182 Is Involved in T2D Pathogenic Processes
Source: J Diabetes Res. 2014 Nov 4;2014:760397. doi: 10.1155/2014/760397 (PMC4235598; doi:10.1155/2014/760397)
Supplement: Supplementary file 1 — Table S1. The detailed information of the reads filtering and mapping. Table S2. The miRNA expression profile. Table S3. The fold change value and P-value of the filtered miRNAs in the four comparisons. Table S4. The references and specific expressed tissues of the valid target genes of miR-182. [file 760397.f1.zip › Table S1. The reads filter and mapping information.xls]

## Sheet: Sheet1
	The reads filter information
	Sample No.	Total reads	Q20	Clean Reads	Clean Ratio	Valid Reads	Valid ratio
	11	13326627	0.982	12795166	0.96012	10920930	0.819482
	25	11460407	0.9801	10983074	0.958349	10920930	0.952927
	31	14686201	0.9801	14095258	0.959762	14044098	0.956278
	34	13161728	0.9811	12578041	0.955653	12500385	0.949753
	47	17624354	0.9812	16899587	0.958877	16819601	0.954339
	52	19477232	0.9867	18108066	0.929704	17009674	0.873311
	61	13289351	0.9801	12836586	0.96593	12767961	0.960766
	64	15275660	0.98	14654905	0.959363	14569717	0.953786
	1	7283126	0.9602	7217495	0.991	7142116	0.980639
	6	7786564	0.9614	7745007	0.9947	7683737	0.986794
	8	7271336	0.9681	7239323	0.9956	7184694	0.988084
	9	6608745	0.9654	6583874	0.9962	6530733	0.988196
	all	147251331	0.9654	141736382	0.9962	138094576	0.937815
	Mapping information
	No.	Valid reads	Mapped Human genome	Ratio	Mapped cynomolgus genome	Ratio	Mapped Human miRNA	Ratio	Mapped Macaca miRNA	Ratio	Mapped Human ncRNA except miRNA	Ratio	Mapped Macaca ncRNA except miRNA	Ratio
	52	17009674	16239951	0.954748	16255166	0.955642	16195586	0.95214	16176555	0.951021	60591	0.00356215	14283	0.000839699
	61	12767961	12014926	0.941022	12008477	0.940516	11963799	0.937017	11947036	0.935704	187203	0.0146619	15269	0.00119588
	1	7142116	6435679	0.901089	6438105	0.901428	6352322	0.889417	6335589	0.887075	609537	0.085344	34755	0.0048662
	31	14044098	13362645	0.951478	13359411	0.951247	13339774	0.949849	13319567	0.94841	55268	0.00393532	6686	0.000476072
	34	12500385	11810114	0.94478	11806391	0.944482	11729355	0.938319	11710596	0.936819	277830	0.0222257	19926	0.00159403
	6	7683737	6948494	0.904312	6949453	0.904437	6914755	0.899921	6900323	0.898043	237349	0.0308898	12604	0.00164035
	47	16819601	15907119	0.945749	15907142	0.94575	15840449	0.941785	15819315	0.940529	223003	0.0132585	15601	0.000927549
	64	14569717	13761848	0.944551	13759456	0.944387	13672319	0.938407	13651973	0.93701	412657	0.0283229	23385	0.00160504
	8	7184694	6414993	0.892869	6415940	0.893001	6378758	0.887826	6367350	0.886238	332071	0.0462192	12766	0.00177683
	11	12723682	12003481	0.943397	11994747	0.94271	11905326	0.935682	11889880	0.934468	198411	0.0155938	32934	0.0025884
	25	10920930	10261682	0.939634	10257621	0.939263	10192090	0.933262	10176845	0.931866	229931	0.0210542	15367	0.00140711
	9	6530733	5913961	0.905559	5913096	0.905426	5881140	0.900533	5869652	0.898774	272469	0.041721	11419	0.0017485
	all	139897328	131074893	0.936936	131065005	0.936866	130365673	0.931867	130164681	0.93043	3096320	0.0221328	214995	0.00153681
