# Supplementary material for: Comparative MicroRNA Expression Profiles of Cynomolgus Monkeys, Rat, and Human Reveal that miR-182 Is Involved in T2D Pathogenic Processes
Source: J Diabetes Res. 2014 Nov 4;2014:760397. doi: 10.1155/2014/760397 (PMC4235598; doi:10.1155/2014/760397)
Supplement: Supplementary file 1 — Table S1. The detailed information of the reads filtering and mapping. Table S2. The miRNA expression profile. Table S3. The fold change value and P-value of the filtered miRNAs in the four comparisons. Table S4. The references and specific expressed tissues of the valid target genes of miR-182. [file 760397.f1.zip › Table S2. The miRNA expression profile.xls]

## Sheet: Sheet1
#Each of the miRNA profiles, the copy number of miRNA sequence reads can be used to estimate expression level of each miRNA. For doing the normalization, the profile with the greatest copy number of valid sequence reads is used as the reference, and the values of each of the other profiles are divided by the scaling factor [(total sequence reads, given) / (total sequence reads, reference)]. Here,…
	miRNA	Sequence	noT2d						T2D
			normal1	normal2	normal3	induced1	induced2	induced3	normal_t2d1	normal_t2d2	normal_t2d3	induced_t2d1	induced_t2d2	induced_t2d3
	miR-140-5p	CAGTGGTTTTACCCTATGGTAG	4	31.9732	171.475	8.4781	65.3151	70.8392	26.2938	51.3686	82.8621	26.737	43.6108	148.46
	miR-361-5p	TTATCAGAATCTCCAGGGGTACT	82	748.705	1583.77	129.594	928.019	923.123	621.95	944.481	861.765	231.275	725.809	739.694
	miR-6847-5p	ACAGAGGACAGTGGCGTGTGAGCT	15	13.3222	50.0136	9.6893	21.7717	24.351	3.0339	29.1867	21.3074	21.3896	26.478	10.4182
	miR-1260b	ATCCCACCACTGCCACCATT	10	121.232	357.24	1.2112	131.991	148.32	48.5424	79.3878	125.477	49.4635	96.5668	132.833
	miR-185-3p	CAGGGGCTGGCTTTCCTCTGGT	5	6.6611	45.2504	4.8446	14.9681	13.2823	14.1582	11.6747	11.8374	29.4107	18.6904	13.0228
	miR-502-3p	AATGCACCTGGGCAAGGATTCA	4	1.3322	7.1448	0	6.8037	4.4274	2.0226	5.8373	7.1025	6.6843	1.5575	7.8137
	miR-30d-5p	TGTAAACATCCCCGACTGGAAGCTGT	3407	19443.7	29489	4276.61	22939.2	7092.77	14088.4	26791	10741.3	14609.1	19900.6	9730.63
	miR-30e-3p	CTTTCAGTCGGATGTTTACAGC	1041	451.621	2264.9	225.276	555.179	998.39	464.187	547.542	968.302	971.891	593.419	940.245
	miR-381-3p	ATATACAAGGGCAAGCTCTCTGT	261	130.557	523.952	81.1478	178.256	179.312	182.034	138.929	288.834	1076.17	242.975	195.342
	miR-23c	ATCACATTGCCAGTGATTACC	0	2.6644	0	1.2112	10.8859	0	2.0226	3.5024	0	1.3369	0	0
	miR-221-3p	AGCTACATTGTCTGCTGGGTTTCA	532	5375.49	12944	1149.39	6527.43	6503.92	3270.55	6526.14	6553.21	3989.16	4772.27	6368.14
	miR-373-3p	GAAGTGCTTCGATTTTGGGGTGT	0	1.3322	2.3816	1.2112	4.0822	0	11.1243	4.6699	2.3675	2.6737	1.5575	2.6046
	miR-374b-3p	CTTAGCAGGTTGTATTATCATT	1	1.3322	16.6712	0	0	11.0686	2.0226	5.8373	9.47	1.3369	9.3452	15.6273
	miR-185-5p	TGGAGAGAAAGGCAGTTCCTGAT	202	881.927	2105.34	165.929	926.659	825.719	496.549	658.452	1370.78	582.867	513.985	1528.88
	miR-652-3p	AATGGCGCCACTAGGGTTGTGCA	240	983.175	3510.48	163.507	981.088	2038.84	796.905	1008.69	2649.22	574.846	738.269	2565.49
	miR-17-5p	TCAAAGTGCTTACAGTGCAGGTAGT	242	3732.87	7523.48	515.955	4989.8	3325.01	2751.75	4124.66	3196.11	1097.56	2784.86	2977.01
	miR-873-5p	TGCAGGAACTTGTGAGTCT	0	0	0	0	0	2.2137	0	2.3349	7.1025	13.3685	0	0
	miR-3200-5p	AATCTGAGAAGGCGCACAAGGTT	0	6.6611	4.7632	1.2112	8.1644	2.2137	2.0226	2.3349	4.735	4.0106	4.6726	2.6046
	miR-4508	AAGCGGGGCTGGGCGCGC	2	1.3322	0	1.2112	4.0822	0	0	0	0	4.0106	3.1151	5.2091
	miR-1262	TGATGGGTGAATTTGTAGAAGGA	3	0	11.908	0	4.0822	2.2137	6.0678	5.8373	4.735	2.6737	0	0
	miR-92b-3p	TATTGCACTCGTCCCGGCCTCC	686	861.943	1386.09	918.061	1755.34	1671.36	987.029	1643.79	722.084	2423.71	647.932	1213.72
	miR-29c-5p	ACCGATTTCTCCTGGTGTTCAGA	2	11.9899	107.172	2.4223	14.9681	90.7627	16.1808	11.6747	146.784	8.0211	10.9027	135.437
	miR-374b-5p	ATATAATACAACCTGCTAAGTGT	13	133.221	378.675	14.5339	122.466	126.182	81.9154	100.402	232.014	49.4635	129.275	192.737
	let-7i-5p	CTGAGGTAGTAGTTTGTGCTGTT	21413	11285.2	28231.5	4472.82	11895.5	14586.2	8160.19	11665.3	15265.6	18590.3	11321.7	13197.3
	miR-33a-5p	GTGCATTGTAGTTGCATTG	0	2.6644	42.8688	3.6335	2.7215	55.3431	1.0113	3.5024	26.0424	0	1.5575	80.7413
	miR-154-5p	TAGGTTATCCGTGTTGCCTTCG	1	1.3322	9.5264	0	1.3607	2.2137	2.0226	2.3349	0	2.6737	9.3452	2.6046
	miR-212-3p	TAACAGTCTCCAGTCAGGGC	1	5.3289	7.1448	0	2.7215	2.2137	0	5.8373	4.735	4.0106	0	0
	miR-181c-3p	ACCATCGACCGTTGAGTGGACC	9	18.651	116.698	6.0558	27.2146	50.9157	23.2599	36.1915	28.4099	32.0844	57.6286	44.2775
	miR-3158-3p	AGGGCTTCCTCTCTGCAGGACC	75	66.6108	226.252	32.7014	74.8403	68.6254	50.565	126.087	101.802	108.285	71.6464	96.3687
	miR-1226-3p	TCACCAGCCCTGTGTTCCCTAG	2	10.6577	11.908	2.4223	4.0822	11.0686	2.0226	8.1723	9.47	4.0106	6.2301	7.8137
	miR-127-3p	TCGGATCCGTCTGAGCTTGGCT	401	2131.54	3560.49	234.965	1511.77	1228.62	1894.17	951.486	1723.53	1724.54	1760.01	1323.12
	miR-4732-3p	TGACCTGTTCTGTTCTGCCCC	3	3.9966	14.2896	0	1.3607	4.4274	4.0452	3.5024	0	12.0317	3.1151	5.2091
	miR-23b-3p	ATCACATTGCCAGGGATTACCAC	70	345.044	1026.47	71.4585	424.548	520.225	209.339	311.714	700.776	132.348	221.169	640.721
	miR-335-3p	TTTTTCATTATTGCTCCTGACC	0	22.6477	83.3561	0	9.5251	22.1372	15.1695	15.1771	23.6749	2.6737	14.0178	2.6046
	miR-654-3p	TATGTCTGCTGACCATCACCTT	21	229.141	754.968	29.0679	225.881	239.082	175.966	172.785	310.141	394.371	313.063	223.992
	miR-3613-5p	TGTTGTACTTTTTTTTTTGTTC	7	165.195	357.24	8.4781	107.498	236.869	43.4859	107.407	116.007	6.6843	45.1684	213.574
	miR-125b-5p	TCCCTGAGACCCTAACTTGTGA	2	15.9866	40.4872	0	8.1644	8.8549	17.1921	21.0144	26.0424	2.6737	9.3452	2.6046
	miR-377-5p	AGAGGTTGCCCTTGGTGAATTC	1	2.6644	7.1448	0	1.3607	6.6412	2.0226	2.3349	7.1025	0	6.2301	5.2091
	miR-429	TAATACTGTCTGGTAAAACCG	0	0	14.2896	0	1.3607	2.2137	0	0	0	1.3369	4.6726	0
	miR-27a-5p	AGGGCTTAGCTGCTTGTGAGCA	2	0	4.7632	0	1.3607	0	1.0113	2.3349	2.3675	2.6737	3.1151	2.6046
	miR-584-3p	TCAGTTCCAGGCCAACCAGGCT	0	7.9933	7.1448	14.5339	21.7717	26.5647	5.0565	17.512	16.5724	1.3369	17.1328	28.6501
	miR-942-3p	CACATGGCCGAAACAGAGAAGG	0	2.6644	11.908	0	1.3607	0	1.0113	2.3349	0	0	3.1151	0
	miR-4762-5p	CCAAATCTTGATCCGAAGCCT	0	6.6611	2.3816	0	5.4429	8.8549	6.0678	7.0048	4.735	1.3369	3.1151	5.2091
	miR-450a-5p	TTTTGCGATGTGTTCCTAATAT	0	0	11.908	0	1.3607	4.4274	0	1.1675	0	0	1.5575	2.6046
	miR-940	AAGGCAGGGCCCCCGCTCCC	1	2.6644	7.1448	2.4223	2.7215	6.6412	6.0678	3.5024	9.47	2.6737	4.6726	5.2091
	miR-324-5p	CGCATCCCCTAGGGCATTGGTGT	7	33.3054	85.7377	13.3228	38.1005	59.7706	35.3955	50.2011	44.9823	45.453	37.3807	54.6957
	miR-33b-3p	CAGTGCCTCGGCAGTGCAGCCT	0	3.9966	2.3816	0	6.8037	0	3.0339	0	0	0	0	5.2091
	miR-1294	TCCTGTGAGGTTGGCATTGTTG	0	0	0	0	8.1644	0	1.0113	0	2.3675	5.3474	0	0
	miR-671-3p	CTCCGGTTCTCAGGGCTCCACCT	311	197.168	793.073	175.619	164.649	263.433	171.921	275.522	414.31	487.951	186.904	354.22
	miR-18a-5p	TAAGGTGCATCTAGTGCAGATAGT	22	345.044	1388.47	47.2353	382.366	1248.54	220.464	284.862	1079.57	70.8531	202.479	1250.19
	miR-3120-3p	CACAGCAAGTGTAGACAGGCA	0	1.3322	2.3816	1.2112	4.0822	0	0	2.3349	2.3675	0	4.6726	0
	miR-9-5p	TCTTTGGTTATCTAGCTGTATGA	278	10.6577	121.462	2.4223	14.9681	4.4274	77.8702	14.0096	11.8374	50.8004	18.6904	18.2319
	miR-1306-5p	CCACCTCCCCTGCAAACGTCCA	1	9.3255	45.2504	3.6335	12.2466	37.6333	11.1243	1.1675	47.3498	2.6737	9.3452	39.0684
	miR-184	TGGACGGAGAACTGATAAGGGT	2	3.9966	0	0	2.7215	0	5.0565	1.1675	0	2.6737	0	2.6046
	miR-23a-3p	ATCACATTGCCAGGGATTTCCAA	55	262.446	1333.7	52.08	259.9	506.943	238.667	317.551	916.218	197.854	313.063	588.63
	miR-143-3p	TGAGATGAAGCACTGTAGCTCA	34	127.893	221.489	92.0483	287.115	61.9843	385.306	388.767	196.501	232.612	221.169	36.4638
	miR-93-3p	ACTGCTGAGCTAGCACTTCCCGA	1	111.906	352.477	7.267	99.3334	159.388	30.339	60.7083	170.459	24.0633	70.0888	130.228
	miR-378c	ACTGGACTTGGAGTCAGAAGA	1	7.9933	11.908	0	2.7215	4.4274	3.0339	1.1675	7.1025	4.0106	1.5575	7.8137
	miR-7-3p	CAACAAATCACAGTCTGCCATA	1	6.6611	73.8296	0	8.1644	13.2823	15.1695	11.6747	33.1448	2.6737	17.1328	23.441
	miR-125a-5p	TCCCTGAGACCCTTTAACCTGTGA	13	105.245	185.765	20.5897	160.566	168.243	86.9719	110.909	222.544	65.5057	137.063	171.901
	miR-10b-5p	TACCCTGTAGAACCGAATTTGTGT	3726	2164.85	4620.31	2719.06	4089	3057.15	1721.23	5062.14	3693.28	1632.3	6051	2320.66
	miR-148b-5p	GAAGTTCTGTTATACACTCAGGCT	5	30.641	188.147	13.3228	65.3151	19.9235	25.2825	53.7035	75.7596	52.1372	37.3807	57.3003
	miR-4454	TCCGAGTCACGGCACCAAA	1	3.9966	47.632	0	8.1644	53.1294	6.0678	10.5072	35.5123	5.3474	1.5575	26.0456
	miR-374a-5p	TTATAATACAACCTGATAAGTGT	18	170.524	500.136	36.3349	208.192	126.182	117.311	303.542	210.706	32.0844	190.019	247.433
	miR-423-3p	AGCTCGGTCTGAGGCCCCTCAGTCT	5002	8085.22	22494.2	3340.38	9042.06	7491.24	5005.94	9616.43	11640.9	13258.9	5881.23	8738.29
	miR-450b-5p	TTTTGCAATATGTTCCTGAATAT	1	5.3289	33.3424	2.4223	1.3607	2.2137	1.0113	14.0096	7.1025	2.6737	4.6726	2.6046
	miR-146a-5p	TGAGAACTGAATTCCATGGGTTGT	244	3647.61	297.7	598.314	2711.94	101.831	2345.21	3710.21	92.332	1739.24	2434.42	114.601
	miR-331-5p	TTCTAGGTATGGTCCCAGGGATC	40	403.661	1076.48	71.4585	710.302	334.272	272.04	410.949	449.823	122.99	386.267	286.501
	miR-16-3p	ACCAATATTACTGTGCTGCTT	5	11.9899	92.8825	0	9.5251	44.2745	2.0226	16.3445	52.0847	12.0317	6.2301	44.2775
	miR-28-3p	CACTAGATTGTGAGCTCCTGGAG	338	608.822	2772.18	104.16	730.713	1359.23	572.396	483.332	1562.54	620.299	638.587	1351.77
	miR-4792	CGGTGAGCTCTCGCTGGCC	1	3.9966	14.2896	0	1.3607	8.8549	1.0113	5.8373	14.2049	4.0106	3.1151	7.8137
	miR-610	TGAGCTAAATGTGTGCTGGGAC	8	10.6577	30.9608	0	9.5251	15.4961	12.1356	18.6795	30.7773	14.7054	28.0355	2.6046
	miR-31-5p	AGGCAAGATGCTGGCATAGCTG	5	2.6644	7.1448	0	0	0	0	2.3349	0	4.0106	1.5575	5.2091
	miR-425-3p	CATCGGGAATGTCGTGTCCGCCC	75	373.02	435.833	92.0483	853.179	274.502	200.238	405.111	329.081	310.15	341.099	250.038
	miR-10a-5p	TACCCTGTAGATCCGAATTTGTGT	1688	4011.3	4932.3	2926.17	10843.7	3973.63	2878.16	5652.88	4609.5	3685.7	5118.04	2846.78
	let-7a-3p	CTATACAATCTACTGTCTTTCT	0	0	9.5264	0	0	2.2137	0	3.5024	7.1025	0	0	2.6046
	miR-493-3p	TGAAGGTCTACTGTGTGCCAGG	4	3.9966	28.5792	0	1.3607	0	4.0452	3.5024	9.47	16.0422	6.2301	13.0228
	miR-3688-5p	AGCAAAGTCTTTCCATATGTGT	0	2.6644	7.1448	0	1.3607	2.2137	0	1.1675	14.2049	0	1.5575	0
	miR-541-3p	TGGTGGGCACAGAATCCGGACT	1	7.9933	0	0	10.8859	0	5.0565	3.5024	0	1.3369	6.2301	0
	miR-744-5p	TGCGGGGCTAGGGCTAACAGCAGT	962	634.135	1886.23	282.201	748.403	374.119	347.887	600.078	816.783	1236.59	668.18	981.918
	miR-99a-5p	AACCCGTAGATCCGATCTTGTG	5	58.6175	28.5792	15.7451	102.055	28.7784	38.4294	101.57	87.597	22.7265	52.956	26.0456
	miR-532-3p	CCTCCCACACCCAAGGCTTGCA	3	21.3154	114.317	4.8446	29.9361	84.1215	13.1469	23.3494	97.067	14.7054	12.4602	164.087
	miR-196a-5p	TAGGTAGTTTCATGTTGTTGGGAT	51	285.094	885.956	128.383	121.105	232.441	91.0171	384.097	1084.31	243.307	7.7876	789.181
	miR-299-3p	TATGTGGGACGGTAAACCGCTT	7	2.6644	14.2896	1.2112	2.7215	11.0686	2.0226	1.1675	9.47	16.0422	7.7876	5.2091
	miR-150-3p	CTGGTACAGGCCTGGGGGACA	5	22.6477	7.1448	0	13.6073	6.6412	15.1695	11.6747	4.735	10.6948	6.2301	2.6046
	miR-636	TGTGCTTGCTCGTCCCGCCTGCA	1	2.6644	11.908	1.2112	8.1644	4.4274	1.0113	1.1675	2.3675	2.6737	0	2.6046
	miR-126-5p	CATTATTACTTTTGGTACGCGC	432	2449.94	13806.1	406.95	4872.78	8469.71	3087.5	4567.13	6600.56	1638.98	4359.53	6930.73
	miR-4677-3p	TCTGTGAGACCAAAGAACTACT	15	14.6544	33.3424	4.8446	5.4429	4.4274	9.1017	23.3494	11.8374	20.0528	3.1151	7.8137
	miR-4766-5p	TCTGAAAGAGCAGTTGGTGTTT	0	6.6611	26.1976	2.4223	9.5251	17.7098	16.1808	3.5024	16.5724	8.0211	1.5575	23.441
	miR-758-3p	TTTGTGACCTGGTCCACTACC	0	2.6644	0	0	1.3607	0	1.0113	1.1675	11.8374	1.3369	4.6726	2.6046
	miR-3122	GTTGGGACAAGAGAACGGTCTT	24	33.3054	80.9745	18.1674	43.5434	15.4961	33.3729	50.2011	47.3498	92.2428	35.8232	20.8365
	miR-3613-3p	ACAAAAAAAAAAGCCCAACCCT	1	5.3289	50.0136	6.0558	10.8859	17.7098	6.0678	8.1723	30.7773	1.3369	10.9027	28.6501
	miR-3174	TAGTGAGTTAGAAATGCAGAGCC	3	0	26.1976	2.4223	9.5251	0	1.0113	4.6699	2.3675	8.0211	3.1151	0
	miR-25-5p	AGGCGGAGACTTGGGCAATTGCT	5	18.651	38.1056	7.267	24.4932	17.7098	5.0565	16.3445	7.1025	16.0422	12.4602	20.8365
	miR-101-3p	TACAGTACTGTGATAACTGAAGG	3054	2733.71	15744.8	1354.08	3747.46	10256.2	2810.4	7346.87	8790.48	4971.75	2932.83	12421.1
	miR-548am-3p	AAACTGCAGTTACTTTTGTACC	0	1.3322	16.6712	2.4223	4.0822	2.2137	2.0226	8.1723	11.8374	8.0211	1.5575	2.6046
	miR-101-5p	CAGTTATCACAGTGCTGATGC	0	1.3322	9.5264	0	0	11.0686	1.0113	1.1675	9.47	0	0	2.6046
	miR-424-5p	CAGCAGCAATTCATGTTTTGAA	0	0	66.6848	4.8446	6.8037	11.0686	3.0339	29.1867	18.9399	6.6843	15.5753	26.0456
	miR-371a-5p	ACTCAAACTGTGGGGGCACT	0	0	21.4344	0	6.8037	4.4274	17.1921	9.3397	4.735	0	1.5575	0
	miR-194-5p	TGTAACAGCAACTCCATGTGGAA	9	402.329	383.438	62.9804	596.001	301.067	64.7232	347.905	71.0246	106.948	417.418	226.597
	miR-29b-5p	CTGGTTTCACATGGTGGCTTAGA	0	5.3289	4.7632	1.2112	1.3607	13.2823	0	0	0	2.6737	1.5575	5.2091
	miR-376c-3p	AACATAGAGGAAATTCCACGT	0	2.6644	11.908	0	1.3607	8.8549	2.0226	0	2.3675	1.3369	6.2301	5.2091
	miR-363-3p	AATTGCACGGTATCCATCTGTAA	21	111.906	447.741	44.813	189.142	243.51	142.593	330.393	565.83	143.043	196.249	526.121
	miR-148a-5p	CAAAGTTCTGAGACACTCCGACT	216	74.6041	345.332	69.0362	148.32	137.251	136.526	177.455	224.911	426.456	208.709	192.737
	miR-873-3p	GAGACTGATGAGTTCCCGGGAA	0	6.6611	4.7632	0	0	4.4274	3.0339	5.8373	11.8374	13.3685	4.6726	5.2091
	miR-30b-5p	TGTAAACATCCTACACTCAGCTGT	32	341.047	2336.35	42.3907	398.695	1036.02	276.085	479.829	1216.89	101.601	330.196	1237.17
	miR-320c	AAAAGCTGGGTTGAGAGGAT	0	0	0	0	6.8037	2.2137	0	1.1675	4.735	0	0	7.8137
	miR-7976	TGCCCTGAGACTTTTGCTGTAA	0	1.3322	0	0	5.4429	0	2.0226	3.5024	0	1.3369	3.1151	0
	miR-375	TTTGTTCGTTCGGCTCGCGTGA	1	19.9832	21.4344	2.4223	14.9681	19.9235	11.1243	16.3445	73.3921	16.0422	23.3629	18.2319
	miR-99b-5p	CACCCGTAGAACCGACCTTGCG	68	503.577	181.002	140.495	1057.29	250.151	624.984	329.226	276.996	177.801	1041.99	231.806
	miR-627-5p	TGAGTCTGTAAGAAAAGAGGAGG	143	183.846	331.043	111.427	168.731	110.686	202.26	244.001	146.784	256.675	149.523	151.064
	miR-424-3p	CAAAACGTGAGGCGCTGCTAT	6	1.3322	23.816	14.5339	5.4429	2.2137	3.0339	145.934	2.3675	139.033	76.319	15.6273
	miR-146b-5p	CTGAGAACTGAATTCCATAGGCTGT	293	1537.38	133.37	603.159	3453.54	24.351	1110.41	3250.23	52.0847	2088.16	2196.12	62.5094
	miR-1277-5p	TATATATATATATGTACGTATG	1	3.9966	11.908	0	2.7215	11.0686	1.0113	3.5024	7.1025	1.3369	1.5575	10.4182
	miR-378a-3p	ACTGGACTTGGAGTCAGAAGGCCT	3073	2588.49	11960.4	1036.75	3699.83	5151.34	2328.01	3720.72	4713.67	5665.58	3449.93	6438.47
	miR-493-5p	TTGTACATGGTAGGCTTTCATT	3	7.9933	14.2896	4.8446	1.3607	2.2137	6.0678	1.1675	0	10.6948	6.2301	2.6046
	miR-3074-5p	GTTCCTGCTGAACTGAGCCAGT	19	15.9866	88.1193	15.7451	19.0502	28.7784	28.3164	57.2059	26.0424	17.3791	32.7081	31.2547
	miR-221-5p	ACCTGGCATACAATGTAGATTTCTGT	5	22.6477	16.6712	2.4223	29.9361	17.7098	6.0678	29.1867	9.47	18.7159	21.8054	10.4182
	miR-210-5p	AGCCCCTGCCCACCGCACACTGC	5	18.651	45.2504	3.6335	20.411	4.4274	7.0791	15.1771	40.2473	8.0211	15.5753	20.8365
	miR-24-3p	TGGCTCAGTTCAGCAGGAACAG	25	279.765	195.291	62.9804	378.284	106.259	206.305	319.886	153.887	172.454	277.24	72.9276
	miR-219a-3p	AGAGTTGAGTCTGGACGTCCCGA	8	10.6577	28.5792	9.6893	14.9681	24.351	3.0339	7.0048	2.3675	13.3685	17.1328	13.0228
	miR-181d-5p	AACATTCATTGTTGTCGGTGGGTT	47	15.9866	66.6848	4.8446	23.1324	42.0608	18.2034	33.8566	35.5123	28.0739	18.6904	44.2775
	miR-15b-5p	TAGCAGCACATCATGGTTTACATG	1559	9019.1	25749.9	1969.35	11993.5	13366.5	7113.49	8243.49	17623.6	3721.79	7240.96	13812
	miR-223-3p	TGTCAGTTTGTCAAATACCCCAAGT	105	1835.79	6768.51	182.885	3136.49	2857.92	1081.08	2685.18	2291.73	1140.33	2583.94	2041.97
	miR-142-5p	CATAAAGTAGAAAGCACTACTAA	229	3005.48	15937.7	1157.87	2517.35	5795.53	2516.12	6223.77	7327.37	1554.76	2213.25	7717.31
	miR-451b	TAGCAAGAGAACCCTTACCATT	0	0	4.7632	0	0	0	1.0113	0	11.8374	0	3.1151	5.2091
	miR-598-3p	TACGTCATCGTTGTCATCGTCA	4	7.9933	54.7768	2.4223	10.8859	30.9921	9.1017	8.1723	16.5724	6.6843	10.9027	18.2319
	miR-139-5p	TCTACAGTGCACGTGTCTCCAGT	0	6.6611	7.1448	0	6.8037	6.6412	7.0791	10.5072	0	1.3369	10.9027	2.6046
	miR-22-5p	AGTTCTTCAGTGGCAAGCTTTA	1	7.9933	28.5792	0	13.6073	33.2059	3.0339	15.1771	16.5724	6.6843	12.4602	18.2319
	miR-486-3p	CGGGGCAGCTCAGTACAGGATA	2	3.9966	376.293	1.2112	19.0502	132.823	8.0904	25.6843	123.109	16.0422	12.4602	140.646
	miR-134-5p	TGTGACTGGTTGACCAGAGGGG	4	25.3121	33.3424	1.2112	17.6895	33.2059	11.1243	15.1771	23.6749	26.737	12.4602	18.2319
	miR-449a	TGGCAGTGTATTGTTAGCTGGT	5	22.6477	7.1448	8.4781	27.2146	37.6333	41.4633	40.8614	21.3074	92.2428	23.3629	10.4182
	miR-487b-3p	AATCGTACAGGGTCATCCACTTT	0	13.3222	40.4872	0	8.1644	6.6412	9.1017	5.8373	14.2049	13.3685	9.3452	7.8137
	miR-28-5p	AAGGAGCTCACAGTCTATTGAGT	16	98.5839	309.608	19.3786	102.055	99.6176	77.8702	103.905	213.074	57.4846	118.372	174.505
	miR-128-3p	TCACAGTGAACCGGTCTCTTTTT	179	1693.25	3358.06	284.623	1894.14	1350.37	965.792	2176.16	1931.87	906.385	1417.35	1705.99
	miR-323a-3p	CACATTACACGGTCGACCTCT	0	0	7.1448	0	1.3607	4.4274	0	0	2.3675	8.0211	0	0
	miR-138-5p	AGCTGGTGTTGTGAATCAGGCCGT	1	19.9832	190.528	8.4781	28.5754	130.61	12.1356	37.359	487.702	5.3474	28.0355	208.365
	miR-215-5p	ATGACCTATGAATTGACAGACA	0	3.9966	19.0528	2.4223	1.3607	11.0686	6.0678	9.3397	11.8374	14.7054	7.7876	5.2091
	miR-4448	GGCTCGTTGGTCTAGGGG	0	0	2.3816	0	2.7215	8.8549	3.0339	0	2.3675	0	0	5.2091
	miR-340-3p	TCCGTCTCAGTTACTTTATAGCC	13	59.9497	409.635	12.1116	76.201	79.6941	17.1921	51.3686	163.357	32.0844	34.2657	96.3687
	miR-605-5p	TAAATCCCACGGTGCCTTCTCC	4	25.3121	35.724	2.4223	39.4612	55.3431	26.2938	28.0192	33.1448	4.0106	26.478	72.9276
	miR-550a-3p	TGTCCTACTCCCTCAGGCACA	0	3.9966	16.6712	1.2112	5.4429	4.4274	2.0226	2.3349	11.8374	6.6843	3.1151	13.0228
	miR-3160-3p	GAGAGCTGAGACTAGAAAGCC	4	7.9933	16.6712	4.8446	6.8037	11.0686	4.0452	8.1723	7.1025	20.0528	10.9027	28.6501
	miR-451a	AAACCGTTACCATTACTGAGTTTAGT	22019	169262	1.14747e+06	34134.2	246297	427696	164607	369149	653422	139148	246862	580457
	miR-126-3p	CTCGTACCGTGAGTAATAATGCG	83	397	1431.34	98.1041	782.421	664.117	380.249	570.892	613.179	451.856	529.56	567.794
	miR-150-5p	TGTCTCCCAACCCTTGTACCAGTG	191	4589.48	14982.7	278.567	1947.21	9383.98	1533.13	2186.67	11522.6	589.552	1610.49	9501.43
	miR-361-3p	TCCCCCAGGTGTGATTCTGATTTGC	26	163.863	557.295	49.6576	238.128	250.151	180.012	227.656	232.014	169.78	193.134	244.828
	miR-4446-3p	CAGGGCTGGCAGTGAGATGGGT	7	18.651	28.5792	2.4223	27.2146	17.7098	23.2599	15.1771	18.9399	8.0211	10.9027	36.4638
	miR-3202	AAGGGAGAAGAGCTTTAATGAT	0	1.3322	2.3816	1.2112	2.7215	4.4274	8.0904	7.0048	4.735	1.3369	4.6726	13.0228
	let-7e-5p	TGAGGTAGGAGGTTGTATAGTT	17	118.567	147.659	46.0241	209.553	66.4117	158.774	164.613	97.067	212.559	118.372	93.7641
	miR-380-3p	TATGTAATATGGTCCACGTCT	3	22.6477	161.949	7.267	35.379	59.7706	32.3616	24.5168	78.1271	57.4846	62.3012	52.0912
	miR-628-5p	ATGCTGACATATTTACTAGAGG	1	5.3289	38.1056	2.4223	5.4429	6.6412	6.0678	5.8373	16.5724	2.6737	1.5575	5.2091
	let-7b-3p	CTATACAACCTACTGCCTTCC	0	3.9966	33.3424	0	4.0822	17.7098	1.0113	5.8373	18.9399	2.6737	4.6726	18.2319
	miR-146b-3p	TGCCCTATGGACTCAGTTCTGG	4	1.3322	2.3816	1.2112	2.7215	6.6412	0	0	2.3675	2.6737	0	5.2091
	miR-182-5p	TTTGGCAATGGTAGAACTCACACTGGT	2048	1865.1	2252.99	3260.45	4097.16	916.482	1048.72	1279.54	1141.13	736.605	778.765	625.094
	miR-103a-3p	AGCAGCATTGTACAGGGCTATGAA	3657	4096.56	14351.5	1604.79	5987.22	8799.55	4729.85	6581.02	8163.1	9632.02	5660.06	7868.37
	let-7i-3p	CTGCGCAAGCTACTGCCTTGCT	2	25.3121	47.632	0	32.6576	35.4196	8.0904	24.5168	28.4099	17.3791	38.9382	41.6729
	miR-203b-3p	ACTGTTAAGAACCACTGGACCCA	0	193.171	0	0	0	0	0	0	0	0	0	0
	miR-342-5p	AGGGGTGCTATCTGTGATTGA	0	2.6644	2.3816	0	0	2.2137	1.0113	1.1675	7.1025	0	0	5.2091
	miR-199b-5p	CCCAGTGTTTAGACTATCTGTTC	0	9.3255	28.5792	0	2.7215	6.6412	8.0904	15.1771	4.735	2.6737	0	2.6046
	miR-877-5p	GTAGAGGAGATGGCGCAGGGGA	12	23.9799	80.9745	8.4781	23.1324	84.1215	36.4068	31.5216	47.3498	14.7054	26.478	114.601
	miR-191-3p	CTGCGCTTGGATTTCGTCCCCT	4	10.6577	57.1584	1.2112	20.411	11.0686	8.0904	14.0096	21.3074	4.0106	9.3452	15.6273
	let-7g-3p	CTGTACAGGCCACTGCCTTGC	0	9.3255	21.4344	2.4223	6.8037	2.2137	3.0339	17.512	7.1025	1.3369	3.1151	7.8137
	miR-769-5p	CTGAGACCTCTGGGTTCTGAGCT	40	113.238	169.094	26.6456	137.434	44.2745	80.9041	135.426	56.8197	152.401	118.372	125.019
	miR-411-3p	TATGTAACACGGTCCACTAAC	2	3.9966	7.1448	0	6.8037	0	7.0791	0	11.8374	20.0528	1.5575	7.8137
	miR-27b-5p	AGAGCTTAGCTGATTGGTGAAC	1	3.9966	7.1448	0	2.7215	2.2137	3.0339	3.5024	9.47	6.6843	9.3452	5.2091
	miR-125b-3p	ACAAGTCAGGCTCTTGGGACC	2	2.6644	4.7632	0	5.4429	0	6.0678	4.6699	2.3675	9.358	6.2301	0
	miR-19a-3p	TGTGCAAATCTATGCAAAACTGA	9	78.6007	785.928	26.6456	89.8083	502.515	20.226	117.914	336.183	42.7792	37.3807	554.771
	miR-1284	TCTGTACAGACCCTGGCTTTTC	0	1.3322	4.7632	0	4.0822	4.4274	1.0113	1.1675	7.1025	0	0	5.2091
	miR-15b-3p	CGAATCATTATTTGCTGCTCTA	9	127.893	619.216	10.9005	141.516	146.106	104.164	218.316	87.597	74.8637	214.939	229.201
	miR-32-5p	TATTGCACATTACTAAGTTGCA	11	109.242	1226.52	24.2232	216.356	630.911	119.334	311.714	823.886	60.1583	213.382	804.808
	miR-1301-3p	TTGCAGCTGCCTGGGAGTGACT	0	3.9966	4.7632	0	4.0822	2.2137	3.0339	5.8373	7.1025	4.0106	3.1151	5.2091
	miR-196b-5p	TAGGTAGTTTCCTGTTGTTGGGAT	47	97.2517	157.186	55.7134	153.763	119.541	42.4746	220.651	213.074	50.8004	151.08	98.9732
	miR-181b-5p	AACATTCATTGCTGTCGGTGGGTTT	1340	663.443	3208.02	697.629	869.508	2849.06	872.753	1640.29	2017.1	1818.12	1330.13	1304.88
	miR-370-3p	GCCTGCTGGGGTGGAACCTGGT	10	13.3222	23.816	6.0558	24.4932	8.8549	3.0339	12.8421	16.5724	50.8004	4.6726	10.4182
	miR-574-3p	CACGCTCATGCACACACCCACA	13	54.6208	219.107	15.7451	65.3151	92.9764	70.791	52.536	73.3921	25.4002	74.7614	114.601
	miR-1266-5p	CCTCAGGGCTGTAGAACAGGACT	2	1.3322	7.1448	3.6335	1.3607	2.2137	2.0226	5.8373	2.3675	1.3369	0	2.6046
	miR-342-3p	TCTCACACAGAAATCGCACCCGTC	43	571.52	573.966	175.619	370.119	777.017	326.65	352.575	636.854	117.643	252.32	830.854
	miR-372-3p	AAAGTGCTGCGACATTTGAGCGT	0	0	7.1448	0	1.3607	4.4274	3.0339	1.1675	0	1.3369	0	0
	miR-584-5p	TTATGGTTTGCCTGGGACTGAGG	2379	2196.82	4451.21	987.097	4910.88	4522.64	1743.48	3870.16	5547.02	3268.6	3837.75	6237.92
	miR-409-5p	AGGTTACCCGAGCAACTTTGCAT	0	2.6644	0	1.2112	4.0822	0	2.0226	0	0	0	10.9027	0
	miR-30d-3p	CTTTCAGTCAGATGTTTGCTGCT	5	18.651	138.133	4.8446	38.1005	48.7019	30.339	44.3638	37.8798	30.7476	34.2657	57.3003
	miR-32-3p	CAATTTAGTGTGTGTGATATT	0	6.6611	19.0528	4.8446	13.6073	8.8549	3.0339	18.6795	4.735	2.6737	4.6726	10.4182
	miR-1307-5p	TCGACCGGACCTCGACCGGCTCG	19	166.527	807.363	30.279	302.082	174.884	59.6667	302.374	265.159	148.391	239.86	471.425
	miR-30c-5p	TGTAAACATCCTACACTCTCAGCTGT	127	2539.2	6475.57	284.623	2696.97	3362.65	1628.19	1901.8	3591.48	672.436	2428.19	3987.58
	let-7b-5p	TGAGGTAGTAGGTTGTGTGGTTT	2080	10601.8	7671.14	5037.22	13080.7	8620.24	9251.38	6619.54	8203.34	7718.98	6308	7110.44
	miR-29c-3p	TAGCACCATTTGAAATCGGTTAT	28	295.752	1745.71	69.0362	443.599	985.107	288.221	498.509	1145.86	288.76	249.205	1440.32
	miR-19b-3p	TGTGCAAATCCATGCAAAACTGA	145	475.601	4077.3	151.395	779.699	2561.28	193.158	671.294	1991.06	462.551	465.701	2643.63
	miR-26a-3p	CCTATTCTTGATTACTTGTTTC	0	1.3322	14.2896	0	0	13.2823	1.0113	3.5024	11.8374	1.3369	3.1151	18.2319
	let-7f-5p	TGAGGTAGTAGATTGTATAGTTGT	128014	113193	366917	38381.7	131573	180635	109292	179216	165625	194914	122011	148449
	miR-203a	GTGAAATGTTTAGGACCACTAGA	0	2481.92	2.3816	0	0	0	0	0	2.3675	0	0	2.6046
	miR-181a-3p	ACCACTGACCGTTGACTGTACCT	268	127.893	790.692	83.5702	172.813	425.035	237.656	381.762	345.653	356.939	235.187	223.992
	miR-34a-5p	TGGCAGTGTCTTAGCTGGTTGT	0	5.3289	7.1448	0	20.411	0	2.0226	3.5024	0	9.358	7.7876	0
	miR-144-3p	CTACAGTATAGATGATGTACT	91	1865.1	14951.7	427.54	1698.19	7396.05	708.922	3215.21	8733.66	466.561	1210.2	8433.56
	miR-30a-5p	TGTAAACATCCTCGACTGGAAGCT	197	1340.21	959.785	477.198	1028.71	1751.06	634.086	1043.72	1988.69	1431.77	2928.16	1802.35
	let-7d-5p	AGAGGTAGTAGGTTGCATAGTTTT	1658	4040.61	8521.37	1601.16	4324.41	4478.36	2739.61	4164.36	5511.51	4160.28	2348.75	4742.9
	miR-26a-5p	TTCAAGTAATCCAGGATAGGCTGT	2961	36107	63564.9	3387.62	39560.6	27412.5	32936	43846.6	43353.4	15831	22560.8	27285.4
	miR-499a-5p	TTAAGACTTGCAGTGATGTTTA	7	18.651	26.1976	1.2112	54.4293	115.114	33.3729	22.1819	123.109	18.7159	12.4602	70.3231
	miR-320a	AAAAGCTGGGTTGAGAGGGCGAAAA	2871	2448.61	9619.29	1208.74	3816.85	6661.1	1910.35	4615	7007.76	3890.24	2738.14	6649.44
	miR-624-5p	TAGTACCAGTATCTTGTGTTCA	0	3.9966	11.908	1.2112	1.3607	6.6412	2.0226	4.6699	14.2049	0	6.2301	5.2091
	miR-30e-5p	TGTAAACATCCTTGACTGGAAGCTGT	1182	13199.6	24949.7	2622.17	16697.5	4606.76	7417.89	19579.6	7232.67	8252.38	11891.7	7370.9
	miR-374a-3p	CTTATCAGATTGTATTGTAATT	6	18.651	331.043	8.4781	19.0502	170.457	27.3051	54.871	232.014	21.3896	10.9027	200.551
	miR-141-3p	TAACACTGTCTGGTAAAGATG	0	30.641	9.5264	1.2112	21.7717	8.8549	13.1469	54.871	28.4099	6.6843	15.5753	2.6046
	miR-1271-5p	CTTGGCACCTAGCAAGCACTCA	3	18.651	4.7632	4.8446	40.822	4.4274	10.113	28.0192	4.735	2.6737	42.0533	7.8137
	miR-181a-5p	AACATTCAACGCTGTCGGTGAGTTT	35530	39092.5	142296	35006.2	54053.7	132091	61724.7	123238	130186	104180	68297.7	64942.1
	miR-136-3p	CATCATCGTCTCAAATGAGTCT	1	7.9933	45.2504	1.2112	8.1644	15.4961	4.0452	7.0048	7.1025	21.3896	14.0178	13.0228
	miR-550a-5p	AGTGCCTGAGGGAGTAAGAGCCCT	29	25.3121	121.462	14.5339	43.5434	39.847	25.2825	79.3878	82.8621	36.095	29.5931	67.7185
	miR-18a-3p	ACTGCCCTAAGTGCTCCTTCTGG	15	86.594	540.624	24.2232	122.466	239.082	70.791	117.914	376.43	44.1161	68.5313	375.056
	miR-339-5p	TCCCTGTCCTCCAGGAGCTCACGT	56	263.779	1250.34	64.1916	596.001	489.233	270.017	496.174	698.409	439.824	283.47	492.262
	miR-186-5p	CAAAGAATTCTCCTTTTGGGCTTT	1000	17694.5	54538.7	3014.58	27621.5	21929.2	12036.5	28424.3	31272.1	7196.27	18702.8	28249
	miR-486-5p	TCCTGTACTGAGCTGCCCCGAGCTG	15252869	1.34812e+07	9.76051e+06	1.51923e+07	1.27496e+07	1.20841e+07	1.38469e+07	1.26619e+07	1.15391e+07	1.40815e+07	1.33691e+07	1.23447e+07
	miR-190a-5p	TGATATGTTTGATATATTAGGTTGT	27	115.903	583.492	3.6335	117.023	298.853	88.9945	279.025	395.37	72.19	34.2657	450.589
	miR-339-3p	TGAGCGCCTCGACGACAGAGCCG	915	1225.64	3060.36	518.377	1666.9	1016.1	1165.02	2636.14	2036.04	3199.09	1121.42	1388.23
	miR-1249	ACGCCCTTCCCCCCCTTCTTCA	31	97.2517	338.187	15.7451	74.8403	500.302	53.5989	50.2011	329.081	29.4107	40.4958	247.433
	miR-576-5p	ATTCTAATTTCTCCACATCTTT	0	3.9966	2.3816	0	1.3607	6.6412	4.0452	2.3349	14.2049	2.6737	1.5575	5.2091
	miR-369-5p	AGATCGACCGTGTTATATTCG	3	3.9966	26.1976	1.2112	5.4429	0	7.0791	10.5072	14.2049	22.7265	4.6726	10.4182
	miR-338-5p	AACAATATCCTGGTGCTGAGT	0	1.3322	11.908	0	4.0822	6.6412	2.0226	1.1675	11.8374	0	1.5575	2.6046
	miR-582-5p	TTACAGTTGTTCAACCAGTTACT	0	7.9933	21.4344	0	12.2466	6.6412	3.0339	8.1723	16.5724	1.3369	7.7876	23.441
	miR-320b	AAAAGCTGGGTTGAGAGGGCAA	14	14.6544	26.1976	4.8446	16.3288	24.351	10.113	24.5168	23.6749	10.6948	18.6904	20.8365
	miR-543	AAACATTCGCGGTGCACTTCTTT	3	1.3322	11.908	1.2112	2.7215	4.4274	2.0226	5.8373	2.3675	8.0211	6.2301	2.6046
	miR-93-5p	CAAAGTGCTGTTCGTGCAGGTAGTG	9043	33451.9	93332.6	7403.83	46754.8	32586	27948.3	49421.2	37257.2	28020.4	33641.1	39677.8
	miR-7977	TTCCCGGCCAACGCACCAA	1	17.3188	42.8688	1.2112	21.7717	15.4961	8.0904	8.1723	11.8374	1.3369	10.9027	20.8365
	let-7a-5p	TGAGGTAGTAGGTTGTATAGTTTG	84177	93372.3	141138	38305.4	104114	92416.3	82958	95556.1	92111.8	119388	66846.1	72682.8
	miR-192-5p	CTGACCTATGAATTGACAGCCAGT	464	5596.64	5465.78	2026.27	7222.77	5946.06	1325.82	4741.09	1680.92	4351.45	7446.55	5529.48
	miR-7-5p	TGGAAGACTAGTGATTTTGTTGTTT	275	791.336	173.857	79.9367	881.754	59.7706	321.594	614.088	56.8197	355.603	521.773	46.882
	miR-151b	TCGAGGAGCTCACAGTCTAGA	0	0	2.3816	1.2112	8.1644	2.2137	1.0113	1.1675	4.735	1.3369	1.5575	2.6046
	miR-29b-3p	TAGCACCATTTGAAATCAGTGTT	3	17.3188	154.804	2.4223	32.6576	55.3431	26.2938	28.0192	75.7596	22.7265	21.8054	96.3687
	miR-654-5p	TGGTGGGCCGCAGAACATGTGCT	15	1.3322	0	2.4223	4.0822	0	3.0339	5.8373	0	21.3896	1.5575	2.6046
	miR-1271-3p	AGTGCCTGCTATGTGCCGGGC	0	0	26.1976	0	0	0	1.0113	2.3349	0	0	1.5575	2.6046
	miR-454-5p	ACCCTATCAATATTGTCTCTGCT	1	15.9866	90.5009	10.9005	16.3288	48.7019	13.1469	21.0144	61.5547	22.7265	18.6904	54.6957
	miR-200c-3p	TAATACTGCCGGGTAATGATGGA	1	0	7.1448	0	0	0	4.0452	1.1675	2.3675	1.3369	0	0
	miR-301b	CAGTGCAATGATATTGTCAAAGC	0	5.3289	21.4344	0	2.7215	4.4274	2.0226	0	0	0	3.1151	2.6046
	miR-96-5p	TTTGGCACTAGCACATTTTTGCT	1	5.3289	11.908	13.3228	25.8539	15.4961	2.0226	7.0048	2.3675	0	7.7876	5.2091
	miR-5100	ATCCCAGCGGTGCCTCCA	0	2.6644	4.7632	0	1.3607	2.2137	4.0452	4.6699	4.735	5.3474	1.5575	2.6046
	miR-431-5p	TGTCTTGCAGGCCGTCATGCA	2	15.9866	69.0664	6.0558	16.3288	17.7098	15.1695	11.6747	14.2049	53.4741	21.8054	41.6729
	miR-130b-5p	ACTCTTTCCCTGTTGCACTACT	0	3.9966	33.3424	1.2112	24.4932	17.7098	3.0339	4.6699	18.9399	5.3474	4.6726	5.2091
	miR-200b-3p	TAATACTGCCTGGTAATGATGACT	0	2.6644	4.7632	0	0	6.6412	1.0113	3.5024	0	2.6737	6.2301	0
	miR-92a-3p	TATTGCACTTGTCCCGGCCTGTTGA	155286	468543	937339	114834	564871	580925	400252	530486	623454	306492	467212	450414
	miR-337-3p	CTCCTATATGATGCCTTTCTTC	0	3.9966	28.5792	0	4.0822	8.8549	0	4.6699	18.9399	2.6737	4.6726	7.8137
	miR-130b-3p	CAGTGCAATGATGAAAGGGCAT	30	73.2718	259.595	24.2232	119.744	64.198	36.4068	79.3878	89.9645	24.0633	40.4958	75.5322
	let-7c-5p	TGAGGTAGTAGGTTGTATGGTTT	61	43.9631	90.5009	18.1674	54.4293	15.4961	46.5198	68.8806	47.3498	30.7476	43.6108	20.8365
	miR-491-5p	TGGGGAACCCTTCCATGAGGAGT	1	6.6611	16.6712	4.8446	8.1644	6.6412	5.0565	5.8373	2.3675	1.3369	10.9027	7.8137
	miR-485-5p	AGAGGCTGGCCGTGATGAATTC	1	1.3322	7.1448	0	1.3607	2.2137	1.0113	0	0	4.0106	1.5575	0
	miR-4286	ACCCCACTCCTGGTACCAT	7	35.9698	200.054	4.8446	51.7078	117.327	37.4181	31.5216	101.802	10.6948	24.9205	119.81
	miR-17-3p	ACTGCAGTGAAGGCACTTGTAGC	133	563.527	1690.94	152.606	801.471	672.972	466.21	811.39	890.175	524.046	577.844	770.949
	miR-874-3p	CTGCCCTGGCCCGAGGGACCGACT	0	23.9799	2.3816	3.6335	16.3288	6.6412	10.113	8.1723	7.1025	2.6737	4.6726	5.2091
	miR-660-5p	TACCCATTGCATATCGGAGTTGT	34	62.6141	452.504	36.3349	161.927	177.098	83.938	159.943	317.243	167.106	118.372	312.547
	miR-454-3p	TAGTGCAATATTGCTTATAGGGTTTT	64	455.618	1026.47	65.4027	600.083	511.37	172.932	387.599	482.967	153.738	341.099	544.353
	miR-331-3p	GCCCCTGGGCCTATCCTAGAAC	12	170.524	1850.5	46.0241	342.904	613.202	161.808	159.943	1091.41	64.1689	232.072	849.086
	miR-187-3p	TCGTGTCTTGTGTTGCAGCCGGA	13	257.118	619.216	18.1674	209.553	296.639	125.401	201.972	343.286	70.8531	176.001	414.125
	miR-421	AACAGACATTAATTGGGCGCCTG	82	434.302	1345.6	192.575	523.882	522.439	333.729	530.03	866.5	459.877	542.02	737.09
	miR-3200-3p	CACCTTGCGCTACTCAGGTCTGCT	48	162.53	533.479	66.6139	288.475	210.304	130.458	201.972	269.894	255.339	205.594	390.684
	miR-151a-5p	TCGAGGAGCTCACAGTCTAGTAT	3	46.6275	47.632	8.4781	74.8403	39.847	22.2486	18.6795	40.2473	9.358	49.841	36.4638
	miR-1285-3p	TCTGGGCAACAAATTGAGACC	1	11.9899	138.133	10.9005	25.8539	0	9.1017	11.6747	362.226	14.7054	9.3452	320.361
	miR-144-5p	GGATATCATCATATACTGTAAGTTT	870	2354.02	8187.95	908.371	2711.94	2074.26	1608.98	3275.91	3463.63	3172.35	1336.36	3250.49
	miR-379-3p	TATGTAACATGGTCCACTAAC	0	3.9966	2.3816	0	4.0822	0	2.0226	0	2.3675	4.0106	7.7876	0
	miR-151a-3p	TACTAGACTGAAGCTCCTTGAGGA	820	3754.18	5770.62	1889.41	8397.08	3641.58	5353.83	2696.85	6221.76	1692.45	4367.31	5326.32
	miR-1304-3p	CATCTCACTGTAGCCTCAAACC	26	19.9832	130.988	10.9005	69.3973	77.4803	1.0113	5.8373	0	41.4424	20.2479	39.0684
	miR-122-5p	TGGAGTGTGACAATGGTGTTTG	9	34.6376	0	0	19.0502	0	8.0904	7.0048	0	42.7792	3.1151	0
	miR-30a-3p	CTTTCAGTCGGATGTTTGCAGC	14	13.3222	19.0528	10.9005	2.7215	53.1294	8.0904	12.8421	37.8798	22.7265	23.3629	39.0684
	miR-382-5p	GAAGTTGTTCGTGGTGGATTCG	9	9.3255	26.1976	1.2112	5.4429	13.2823	2.0226	4.6699	21.3074	14.7054	4.6726	15.6273
	miR-136-5p	AGGACTCCATTTGTTTTGATGAT	0	3.9966	4.7632	0	0	0	1.0113	0	2.3675	4.0106	1.5575	0
	miR-26b-3p	CCTGTTCTCCATTACTTGGCTC	4	22.6477	292.937	7.267	20.411	283.357	14.1582	24.5168	260.424	9.358	12.4602	252.642
	miR-107	AGCAGCATTGTACAGGGCTATCA	25	154.537	516.808	44.813	228.603	188.167	149.673	192.632	189.399	183.149	172.886	190.133
	miR-652-5p	ACAACCCTAGGAGAGGGTGCCATT	3	15.9866	83.3561	2.4223	14.9681	13.2823	7.0791	8.1723	54.4522	4.0106	3.1151	49.4866
	miR-582-3p	TAACTGGTTGAACAACTGAACCC	35	27.9765	38.1056	18.1674	44.9042	42.0608	14.1582	53.7035	87.597	61.4952	24.9205	39.0684
	miR-340-5p	TTATAAAGCAATGAGACTGATTG	539	739.38	7478.23	273.723	1340.32	2275.71	792.86	1021.53	3402.08	1101.57	869.102	3604.71
	miR-188-5p	CATCCCTTGCATGGTGGAGGGT	0	0	7.1448	0	1.3607	6.6412	1.0113	1.1675	4.735	0	0	18.2319
	miR-148a-3p	TCAGTGCACTACAGAACTTTGTCT	10961	5736.52	23392.1	2560.4	8919.6	15015.7	9191.71	8018.17	16553.5	9525.07	9846.7	16419.1
	miR-20b-5p	CAAAGTGCTCATAGTGCAGGTAGT	0	3.9966	2.3816	0	9.5251	4.4274	2.0226	7.0048	4.735	1.3369	3.1151	13.0228
	miR-485-3p	GTCATACACGGCTCTCCTCTCT	1	6.6611	19.0528	0	13.6073	15.4961	3.0339	7.0048	30.7773	10.6948	6.2301	15.6273
	miR-1260a	ATCCCACCGCTGCCACCAAAA	6	71.9396	252.45	1.2112	115.662	79.6941	20.226	60.7083	144.417	26.737	48.2834	125.019
	miR-495-3p	AAACAAACATGGTGCACTTCTTT	1	5.3289	11.908	2.4223	1.3607	2.2137	2.0226	5.8373	4.735	1.3369	7.7876	0
	miR-25-3p	CATTGCACTTGTCTCGGTCTGACA	127980	72721.6	197235	41433.8	96312.6	82149.1	77548.6	99415.7	87481	106909	83654.9	87200.6
	miR-106b-3p	CCGCACTGTGGGTACTTGCTGCT	3565	2480.59	9924.13	1408.58	2834.4	3798.75	2304.75	3044.76	4289.89	6324.64	3030.95	5409.67
	miR-412-5p	TGGTCGACCAGTTGGAAAGTAAT	3	3.9966	0	2.4223	1.3607	0	0	1.1675	0	6.6843	3.1151	0
	miR-1307-3p	CTCGGCGTGGCGTCGGTCGTGGT	155	158.534	562.058	138.072	280.311	126.182	329.684	284.862	333.816	378.329	154.196	153.669
	miR-942-5p	TTCTCTGTTTTGGCCATGTGTGT	40	303.745	583.492	29.0679	582.393	243.51	155.74	248.671	274.629	227.265	199.364	244.828
	miR-3688-3p	TATGGAAAGACTTTGTCACT	2	1.3322	2.3816	1.2112	2.7215	2.2137	3.0339	7.0048	2.3675	2.6737	3.1151	0
	miR-409-3p	CGAATGTTGCTCGGTGAACCCCTTT	639	355.702	1264.63	196.208	435.434	387.402	434.859	295.369	421.413	2080.14	538.905	294.315
	miR-548aq-3p	CAAAAACTGCAATTACTTTTGC	2	9.3255	254.831	6.0558	38.1005	37.6333	6.0678	44.3638	151.519	8.0211	31.1506	98.9732
	miR-204-5p	TTCCCTTTGTCATCCTATGCCTG	0	13.3222	11.908	1.2112	9.5251	4.4274	14.1582	23.3494	18.9399	9.358	17.1328	15.6273
	miR-324-3p	CCACTGCCCCAGGTGCTGCTGG	1	1.3322	38.1056	1.2112	20.411	26.5647	7.0791	10.5072	23.6749	6.6843	9.3452	41.6729
	miR-92a-5p	AGGTTGGGATCGGTTGCAATGCT	1	1.3322	7.1448	0	0	2.2137	1.0113	1.1675	0	2.6737	0	5.2091
	miR-423-5p	TGAGGGGCAGAGAGCGAGACTTTT	3411	4785.32	10262.3	1384.36	6184.53	4843.63	4010.82	8366.07	7836.38	7677.54	4982.54	5177.86
	miR-425-5p	AATGACACGATCACTCCCGTTGAGT	373	4871.91	11688.9	736.386	6398.16	5693.7	3760.02	5741.61	8167.83	2707.12	4641.44	4940.85
	miR-181c-5p	AACATTCAACCTGTCGGTGAGTTT	21	69.2752	402.491	25.4344	152.402	128.396	122.367	268.518	139.682	139.033	105.912	192.737
	miR-183-5p	TATGGCACTGGTAGAATTCACTGT	333	1693.25	231.015	1391.62	3546.07	416.18	688.696	802.05	326.713	45.453	512.427	197.946
	miR-889-3p	TTAATATCGGACAACCATTGTT	53	21.3154	157.186	9.6893	31.2968	50.9157	55.6215	19.847	66.2897	148.391	65.4163	85.9504
	miR-338-3p	TCCAGCATCAGTGATTTTGTTG	0	3.9966	9.5264	1.2112	8.1644	6.6412	7.0791	7.0048	2.3675	2.6737	6.2301	5.2091
	let-7f-3p	CTATACAGTCTACTGTCTTTCT	0	0	23.816	0	5.4429	11.0686	0	2.3349	4.735	0	0	2.6046
	miR-15a-3p	CAGGCCATATTGTGCTGCCT	0	3.9966	7.1448	0	2.7215	22.1372	6.0678	2.3349	7.1025	1.3369	3.1151	7.8137
	miR-323b-3p	CCCAATACACGGTCGACCTCT	2	6.6611	9.5264	2.4223	5.4429	11.0686	5.0565	5.8373	7.1025	30.7476	6.2301	15.6273
	miR-98-5p	TGAGGTAGTAAGTTGTATTGTTG	4927	4646.77	7866.43	2493.78	5573.56	4695.31	4329.38	4379.17	4308.83	5771.19	3879.81	4576.21
	miR-5690	TCAGCTACTACCTCTATTAGGAT	17	217.151	552.532	27.8567	353.79	170.457	103.153	363.082	168.092	159.085	423.648	299.524
	miR-574-5p	TGAGTGTGTGTGTGTGAGTGT	0	3.9966	7.1448	0	0	4.4274	4.0452	4.6699	7.1025	0	0	10.4182
	miR-33a-3p	CAATGTTTCCACAGTGCAT	0	1.3322	7.1448	0	0	4.4274	0	0	4.735	0	1.5575	10.4182
	miR-29a-3p	CTAGCACCATCTGAAATCGGTTA	19	339.715	878.811	39.9683	293.918	261.219	154.729	409.781	383.533	148.391	264.78	461.007
	miR-362-5p	AATCCTTGGAACCTAGGTGTGAGT	0	10.6577	47.632	0	19.0502	13.2823	7.0791	4.6699	21.3074	1.3369	6.2301	28.6501
	miR-223-5p	CGTGTATTTGACAAGCTGAGTTGGA	8	6.6611	30.9608	4.8446	12.2466	13.2823	5.0565	17.512	7.1025	10.6948	14.0178	15.6273
	miR-140-3p	TACCACAGGGTAGAACCACGGACA	7263	8618.1	20553.2	2711.79	12609.9	7761.32	8022.65	12749.9	10476.1	10910	12307.6	9751.47
	miR-106b-5p	TAAAGTGCTGACAGTGCAGATAGT	140	1253.61	3539.06	193.786	1249.15	1339.3	713.978	1445.33	1489.15	553.457	1040.43	1732.03
	miR-505-3p	CGTCAACACTTGCTGGTTTCCTCT	0	9.3255	38.1056	2.4223	8.1644	11.0686	7.0791	9.3397	18.9399	5.3474	12.4602	26.0456
	miR-379-5p	TGGTAGACTATGGAACGTAGG	3	2.6644	2.3816	1.2112	2.7215	2.2137	7.0791	2.3349	0	5.3474	4.6726	2.6046
	miR-15a-5p	TAGCAGCACATAATGGTTTGTGGAT	889	6984.81	23349.2	1621.75	9370	10798.5	6186.13	12853.8	14463	4406.26	6184.95	11663.2
	miR-484	TCAGGCTCAGTCCCCTCCCGATAA	419	5499.39	15504.2	1139.7	9037.98	10070.2	3416.17	4816.97	11756.9	3035.99	7049.38	10295.8
	miR-103a-5p	AGCTTCTTTACAGTGCTGCCTTG	0	0	0	0	0	11.0686	0	0	4.735	0	0	10.4182
	miR-26b-5p	TTCAAGTAATTCAGGATAGGTTGT	2241	5695.22	11357.9	1138.49	6969.67	4582.41	6169.95	5712.42	7391.3	6657.52	4219.35	5500.83
	miR-1255b-5p	CGGATAAGCAAAGAAAGTGGTT	0	3.9966	14.2896	1.2112	8.1644	4.4274	3.0339	7.0048	4.735	2.6737	4.6726	10.4182
	miR-369-3p	AATAATACATGGTTGATCTTT	0	2.6644	16.6712	0	5.4429	11.0686	3.0339	4.6699	9.47	1.3369	6.2301	13.0228
	miR-296-3p	GAGGGTTGGGTGGAGGCTCT	6	5.3289	7.1448	6.0558	5.4429	2.2137	6.0678	4.6699	2.3675	8.0211	4.6726	18.2319
	miR-410-3p	AATATAACACAGATGGCCTGT	90	123.896	540.624	60.5581	108.859	92.9764	159.786	115.579	144.417	574.846	225.842	200.551
	miR-132-3p	TAACAGTCTACAGCCATGGTCG	1	9.3255	16.6712	3.6335	2.7215	8.8549	6.0678	5.8373	23.6749	5.3474	9.3452	15.6273
	let-7g-5p	CTGAGGTAGTAGTTTGTACAGTTT	14791	39536.2	85813.9	10551.6	47840.6	38926.1	34207.2	49794.8	36899.7	40644.3	31298.6	37466.6
	miR-432-5p	TCTTGGAGTAGGTCATTGGGTGG	17	21.3154	28.5792	1.2112	13.6073	11.0686	16.1808	12.8421	11.8374	16.0422	9.3452	5.2091
	miR-24-5p	CGTGCCTACTGAGCTGAAACACAGT	0	2.6644	19.0528	0	8.1644	2.2137	0	2.3349	4.735	5.3474	4.6726	13.0228
	miR-628-3p	TCTAGTAAGAGTGGCAGTCGAAG	0	7.9933	30.9608	0	1.3607	11.0686	3.0339	5.8373	28.4099	0	3.1151	13.0228
	miR-21-5p	TAGCTTATCAGACTGATGTTGACT	1247	3835.45	25130.7	1317.74	6053.9	8890.32	3458.65	8081.21	11676.4	6041.23	5786.22	10808.9
	miR-27b-3p	TTCACAGTGGCTAAGTTCTGCA	1661	12509.5	43157	2565.24	16391.4	20603.1	9313.07	20891.8	32337.5	8785.79	9734.56	26983.2
	miR-197-3p	TTCACCACCTTCTCCACCCAGCAT	251	3902.06	10903	580.146	3226.3	6789.49	1971.03	2527.57	7417.34	795.427	1242.91	6274.38
	miR-155-5p	TTAATGCTAATCGTGATAGGGGTTTT	166	458.282	1455.16	151.395	559.261	668.545	340.808	602.413	1115.09	540.088	260.108	783.972
	miR-532-5p	CATGCCTTGAGTGTAGGACCGTT	424	430.306	1624.25	250.71	932.101	863.352	407.554	707.485	944.628	636.341	638.587	1164.24
	miR-326	CCTCTGGGCCCTTCCTCCAG	4	10.6577	92.8825	3.6335	35.379	121.755	23.2599	25.6843	73.3921	16.0422	34.2657	125.019
	miR-296-5p	GAGGGCCCCCCCTCAATCCTGT	9	71.9396	250.068	8.4781	190.502	239.082	65.7345	130.756	156.254	48.1267	129.275	257.851
	miR-378a-5p	CTCCTGACTCCAGGTCCTGTGT	4	21.3154	61.9216	2.4223	36.7398	50.9157	17.1921	30.3542	26.0424	9.358	29.5931	28.6501
	miR-548h-5p	CAAAAGTAATCGTGGTTTTTGT	13	17.3188	104.79	2.4223	38.1005	15.4961	17.1921	19.847	30.7773	21.3896	9.3452	46.882
	let-7d-3p	CTATACGACCTGCTGCCTTTCTT	25	442.296	1021.71	87.2036	597.361	365.264	341.82	540.538	565.83	368.971	490.622	586.026
	miR-30c-3p	CTGGGAGAGGGTTGTTTACTCC	24	38.6342	126.225	15.7451	68.0366	70.8392	27.3051	33.8566	63.9222	24.0633	46.7259	44.2775
	miR-20a-5p	TAAAGTGCTTATAGTGCAGGTAGT	284	4586.82	6897.12	520.799	5426.6	3524.25	2569.72	4992.09	3354.73	1335.51	2610.42	3104.63
	miR-106a-5p	AAAAGTGCTTACAGTGCAGGTAG	1	1.3322	4.7632	0	2.7215	0	3.0339	2.3349	0	1.3369	1.5575	0
	miR-130a-3p	CAGTGCAATGTTAAAAGGGCATT	40	47.9598	121.462	8.4781	47.6256	50.9157	34.3842	67.7131	63.9222	32.0844	24.9205	65.114
	miR-21-3p	CAACACCAGTCGATGGGCTGTCT	175	179.849	728.77	89.626	284.393	376.333	296.311	449.475	456.925	632.331	295.931	382.87
	miR-222-3p	AGCTACATCTGGCTACTGGGTCTCT	263	1196.33	2534.02	232.543	1374.34	1075.87	443.961	901.285	1025.12	744.626	839.509	987.128
	miR-148b-3p	TCAGTGCATCACAGAACTTTGTCT	506	3358.51	3358.06	565.612	4509.47	1806.4	2190.48	3237.39	2021.83	1310.11	3853.33	2013.32
	miR-590-3p	TAATTTTATGTATAAGCTGGTCT	9	81.2651	500.136	15.7451	108.859	73.0529	54.6102	106.24	210.706	42.7792	90.3367	203.155
	miR-128-5p	CGGGGCCGTAGCACTGTCTGAGA	42	9.3255	26.1976	6.0558	25.8539	13.2823	14.1582	26.8518	23.6749	36.095	17.1328	20.8365
	miR-100-5p	AACCCGTAGATCCGAACTTGTGG	1	39.9665	21.4344	7.267	17.6895	13.2823	13.1469	18.6795	28.4099	9.358	9.3452	7.8137
	miR-548u	CAAAGACTGCAATTACTTTTGC	2	13.3222	116.698	3.6335	17.6895	26.5647	6.0678	36.1915	75.7596	20.0528	23.3629	221.387
	miR-500a-3p	ATGCACCTGGGCAAGGATTCTGAG	163	270.44	785.928	118.694	351.069	385.188	235.633	416.786	535.052	298.118	194.691	549.562
	miR-142-3p	TGTAGTGTTTCCTACTTTATGGAT	29	230.473	2562.6	52.08	251.735	1480.98	107.198	406.279	1583.85	101.601	137.063	1497.62
	miR-502-5p	AATCCTTGCTATCTGGGTGCTAGT	0	1.3322	4.7632	1.2112	1.3607	2.2137	1.0113	1.1675	2.3675	0	1.5575	2.6046
	miR-7641	TCGTCTGATCTCGGAAGCT	1	0	2.3816	0	1.3607	0	1.0113	1.1675	2.3675	6.6843	0	0
	miR-22-3p	AAGCTGCCAGTTGAAGAACTGTTG	2976	21331.4	131822	7515.26	42460.3	26354.4	13298.6	31771.5	42292.8	28454.9	37262.3	45811.6
	miR-1180-3p	TTTCCGGCTCGCGTGGGTGTGT	157	313.071	600.164	259.189	280.311	334.272	330.695	245.168	475.865	319.507	210.267	385.475
	miR-16-5p	TAGCAGCACGTAAATATTGGCGTTA	21309	248518	561086	45511.8	369768	260197	176323	319864	360869	105913	241981	283610
	miR-411-5p	ATAGTAGACCGTATAGCGTACG	59	165.195	595.4	48.4465	189.142	152.747	180.012	179.79	331.448	574.846	297.488	184.924
	miR-664a-3p	TATTCATTTATCCCCAGCCTACA	2	19.9832	78.5928	18.1674	31.2968	99.6176	28.3164	40.8614	78.1271	12.0317	42.0533	80.7413
	miR-1296-5p	TTAGGGCCCTGGCTCCATCTCCT	8	105.245	121.462	14.5339	125.187	37.6333	33.3729	52.536	26.0424	33.4213	40.4958	52.0912
	miR-301a-3p	CAGTGCAATAGTATTGTCAAAGC	6	155.869	581.111	32.7014	160.566	192.594	68.7684	168.115	295.936	42.7792	124.602	273.479
	miR-328-3p	CTGGCCCTCTCTGCCCTTCCGT	0	5.3289	35.724	1.2112	13.6073	24.351	14.1582	22.1819	49.7172	8.0211	3.1151	36.4638
	miR-27a-3p	TTCACAGTGGCTAAGTTCCGC	57	472.937	1838.6	78.7255	642.265	584.423	282.153	790.376	1008.55	362.287	633.915	755.322
	miR-3912-3p	TAACGCATAATATGGATATG	0	1.3322	7.1448	1.2112	1.3607	6.6412	2.0226	8.1723	2.3675	1.3369	1.5575	5.2091
	miR-190b	TGATATGTTTGATATTGGGTTGT	112	41.2987	166.712	16.9563	78.9225	92.9764	32.3616	61.8758	75.7596	36.095	54.5135	88.555
	miR-744-3p	CTGTTGCCACTAACCTCAACCT	0	1.3322	2.3816	1.2112	4.0822	2.2137	0	3.5024	2.3675	5.3474	0	2.6046
	miR-671-5p	AGGAAGCCCTGGAGGGGCTGGAG	0	2.6644	23.816	0	2.7215	15.4961	0	3.5024	11.8374	0	1.5575	10.4182
	miR-1285-5p	TAGGGTCTCACTTTGTTGCC	0	5.3289	23.816	0	1.3607	19.9235	5.0565	7.0048	0	0	6.2301	0
	miR-152-3p	TCAGTGCATGACAGAACTTGG	0	7.9933	4.7632	1.2112	2.7215	4.4274	5.0565	3.5024	0	1.3369	4.6726	0
	miR-210-3p	ACTGTGCGTGTGACAGCGGCTGAT	485	865.94	2310.15	330.647	1125.33	878.848	737.238	1277.21	1112.72	907.722	989.031	1127.77
	miR-191-5p	CAACGGAATCCCAAAAGCAGCTGTT	216529	823698	767378	493954	1.07151e+06	986201	758978	1.01196e+06	860972	353115	786025	741695
	miR-33b-5p	GTGCATTGCTGTTGCATTG	12	83.9296	450.123	29.0679	190.502	194.808	49.5537	60.7083	142.049	18.7159	31.1506	333.383
