# Supplementary material for: Comparative MicroRNA Expression Profiles of Cynomolgus Monkeys, Rat, and Human Reveal that miR-182 Is Involved in T2D Pathogenic Processes
Source: J Diabetes Res. 2014 Nov 4;2014:760397. doi: 10.1155/2014/760397 (PMC4235598; doi:10.1155/2014/760397)
Supplement: Supplementary file 1 — Table S1. The detailed information of the reads filtering and mapping. Table S2. The miRNA expression profile. Table S3. The fold change value and P-value of the filtered miRNAs in the four comparisons. Table S4. The references and specific expressed tissues of the valid target genes of miR-182. [file 760397.f1.zip › Table S3. The details of the filtered miRNAs.xls]

## Sheet: Sheet1
All compare
miRNA	normal name	Sequence	fold	T-test p-value	Two-way ANOVA-test p-value	mean	intact1	intact2	intact3	HFD1	HFD2	HFD3	intact_t2d1	intact_t2d2	intact_t2d3	HFD_t2d1	HFD_t2d2	HFD_t2d3
miR-9-5p	miR-9	TCTTTGGTTATCTAGCTGTATGA	-2.03913	0.424164	0.7398	51.9481	278	10.6577	121.462	2.4223	14.9681	4.4274	77.8702	14.0096	11.8374	50.8004	18.6904	18.2319
miR-424-3p	miR-424*	CAAAACGTGAGGCGCTGCTAT	4.52453	0.101114	0.105	36.3044	6	1.3322	23.816	14.5339	5.4429	2.2137	3.0339	145.934	2.3675	139.033	76.319	15.6273
miR-182-5p	miR-182	TTTGGCAATGGTAGAACTCACACTGGT	-2.56293	0.0223524	0.00628	1670.84	2048	1865.1	2252.99	3260.45	4097.16	916.482	1048.72	1279.54	1141.13	736.605	778.765	625.094
miR-1285-3p	miR-1285	TCTGGGCAACAAATTGAGACC	3.36766	0.26499	0.3	76.2742	1	11.9899	138.133	10.9005	25.8539	0	9.1017	11.6747	362.226	14.7054	9.3452	320.361
miR-1304-3p	miR-1304*	CATCTCACTGTAGCCTCAAACC	-2.53883	0.105548	0.111	36.8631	26	19.9832	130.988	10.9005	69.3973	77.4803	1.0113	5.8373	0	41.4424	20.2479	39.0684
miR-204-5p	miR-204	TTCCCTTTGTCATCCTATGCCTG	1.72358	0.00933148	0.0124	11.58	0	13.3222	11.908	1.2112	9.5251	4.4274	14.1582	23.3494	18.9399	9.358	17.1328	15.6273
miR-183-5p	miR-183	TATGGCACTGGTAGAATTCACTGT	-2.92778	0.169679	0.151	848.702	333	1693.25	231.015	1391.62	3546.07	416.18	688.696	802.05	326.713	45.453	512.427	197.946
Intact compare
miRNA	normal name	Sequence	fold	T-test p-value	One-way ANOVA-test p-value	mean	intact1	intact2	intact3	intact_t2d1	intact_t2d2	intact_t2d3
miR-9-5p	miR-9	TCTTTGGTTATCTAGCTGTATGA	-3.13198	0.317421	0.273	85.6394	278	10.6577	121.462	77.8702	14.0096	11.8374
miR-143-3p	miR-143	TGAGATGAAGCACTGTAGCTCA	2.38691	0.0805508	0.0789	225.659	34	127.893	221.489	385.306	388.767	196.501
miR-99a-5p	miR-99a	AACCCGTAGATCCGATCTTGTG	2.02423	0.144076	0.141	53.2988	5	58.6175	28.5792	38.4294	101.57	87.597
miR-424-3p	miR-424	CAAAACGTGAGGCGCTGCTAT	2.68924	0.490571	-	30.4139	6	1.3322	23.816	3.0339	145.934	2.3675
miR-146b-5p	miR-146b	CTGAGAACTGAATTCCATAGGCTGT	2.2222	0.492582	0.476	1062.74	293	1537.38	133.37	1110.41	3250.23	52.0847
miR-486-3p	miR-486-3p	CGGGGCAGCTCAGTACAGGATA	-2.14486	0.612975	0.593	89.8623	2	3.9966	376.293	8.0904	25.6843	123.109
miR-138-5p	miR-138	AGCTGGTGTTGTGAATCAGGCCGT	2.29491	0.566007	0.548	124.785	1	19.9832	190.528	12.1356	37.359	487.702
miR-182-5p	miR-182	TTTGGCAATGGTAGAACTCACACTGGT	-1.76842	0.00472961	0.00233	1605.91	2048	1865.1	2252.99	1048.72	1279.54	1141.13
miR-499a-5p	miR-499a	TTAAGACTTGCAGTGATGTTTA	2.3807	0.315808	0.262	38.4188	7	18.651	26.1976	33.3729	22.1819	123.109
miR-1285-3p	miR-1285	TCTGGGCAACAAATTGAGACC	2.21325	0.587819	0.571	89.0208	1	11.9899	138.133	9.1017	11.6747	362.226
miR-1304-3p	miR-1304*	CATCTCACTGTAGCCTCAAACC	-4.63133	0.256077	-	30.6366	26	19.9832	130.988	1.0113	5.8373	0
miR-33b-5p	miR-33b	GTGCATTGCTGTTGCATTG	-2.00489	0.548065	0.519	133.061	12	83.9296	450.123	49.5537	60.7083	142.049
HFD compare
miRNA	normal name	Sequence	fold	T-test p-value	One-way ANOVA-test p-value	mean	HFD1	HFD2	HFD3	HFD_t2d1	HFD_t2d2	HFD_t2d3
miR-381-3p	miR-381	ATATACAAGGGCAAGCTCTCTGT	3.24719	0.336281	-	325.533	81.1478	178.256	179.312	1076.17	242.975	195.342
miR-9-5p	miR-9	TCTTTGGTTATCTAGCTGTATGA	2.06612	0.168705	0.128	18.2568	2.4223	14.9681	4.4274	50.8004	18.6904	18.2319
miR-744-5p	miR-744	TGCGGGGCTAGGGCTAACAGCAGT	2.02578	0.0870394	0.0857	715.235	282.201	748.403	374.119	1236.59	668.18	981.918
miR-196a-5p	miR-196a	TAGGTAGTTTCATGTTGTTGGGAT	2.06977	0.506777	0.471	253.701	128.383	121.105	232.441	243.307	7.7876	789.181
miR-148a-5p	miR-148a*	CAAAGTTCTGAGACACTCCGACT	2.19941	0.162209	0.118	197.085	69.0362	148.32	137.251	426.456	208.709	192.737
miR-424-3p	miR-424	CAAAACGTGAGGCGCTGCTAT	4.35724	0.188787	-	42.1949	14.5339	5.4429	2.2137	139.033	76.319	15.6273
miR-182-5p	miR-182	TTTGGCAATGGTAGAACTCACACTGGT	-3.81299	0.164501	-	1735.76	3260.45	4097.16	916.482	736.605	778.765	625.094
miR-96-5p	miR-96	TTTGGCACTAGCACATTTTTGCT	-1.78639	0.0482292	0.0365	11.2782	13.3228	25.8539	15.4961	0	7.7876	5.2091
miR-1285-3p	miR-1285	TCTGGGCAACAAATTGAGACC	5.00833	0.423617	-	63.5276	10.9005	25.8539	0	14.7054	9.3452	320.361
miR-409-3p	miR-409	CGAATGTTGCTCGGTGAACCCCTTT	2.7887	0.375838	-	655.401	196.208	435.434	387.402	2080.14	538.905	294.315
miR-183-5p	miR-183	TATGGCACTGGTAGAATTCACTGT	-6.7777	0.237529	-	1018.28	1391.62	3546.07	416.18	45.453	512.427	197.946
miR-889-3p	miR-889	TTAATATCGGACAACCATTGTT	2.57583	0.091167	0.0663	65.2765	9.6893	31.2968	50.9157	148.391	65.4163	85.9504
miR-410-3p	miR-410	AATATAACACAGATGGCCTGT	3.44333	0.176661	-	210.605	60.5581	108.859	92.9764	574.846	225.842	200.551
miR-548u	miR-548u	CAAAGACTGCAATTACTTTTGC	3.4681	0.390885	-	52.1151	3.6335	17.6895	26.5647	20.0528	23.3629	221.387
miR-411-5p	miR-411	ATAGTAGACCGTATAGCGTACG	2.54978	0.186369	0.146	241.266	48.4465	189.142	152.747	574.846	297.488	184.924
noT2D: intact vs HFD
miRNA	normal name	Sequence	fold	T-test p-value	One-way ANOVA-test p-value	mean	intact1	intact2	intact3	HFD1	HFD2	HFD3
miR-30e-3p	miR-30e*	CTTTCAGTCGGATGTTTACAGC	-2.08788	0.346146	0.318	922.728	1041	451.621	2264.9	225.276	555.179	998.39
miR-127-3p	miR-127	TCGGATCCGTCTGAGCTTGGCT	-2.03394	0.379567	0.354	1511.4	401	2131.54	3560.49	234.965	1511.77	1228.62
miR-335-3p	miR-335*	TTTTTCATTATTGCTCCTGACC	-2.03739	0.426273	0.389	22.9444	0	22.6477	83.3561	0	9.5251	22.1372
miR-584-3p	mir-584	TCAGTTCCAGGCCAACCAGGCT	1.86568	0.0248253	0.0211	13.0014	0	7.9933	7.1448	14.5339	21.7717	26.5647
miR-671-3p	mir-671	CTCCGGTTCTCAGGGCTCCACCT	-2.08364	0.330304	0.278	317.49	311	197.168	793.073	175.619	164.649	263.433
miR-9-5p	miR-9	TCTTTGGTTATCTAGCTGTATGA	-7.28139	0.236837	-	71.9895	278	10.6577	121.462	2.4223	14.9681	4.4274
miR-744-5p	miR-744	TGCGGGGCTAGGGCTAACAGCAGT	-2.43809	0.197874	0.159	814.514	962	634.135	1886.23	282.201	748.403	374.119
miR-196a-5p	miR-196a	TAGGTAGTTTCATGTTGTTGGGAT	-2.41805	0.426093	-	283.997	51	285.094	885.956	128.383	121.105	232.441
miR-146b-5p	miR-146b	CTGAGAACTGAATTCCATAGGCTGT	2.05667	0.58722	0.572	1007.47	293	1537.38	133.37	603.159	3453.54	24.351
miR-142-5p	mir-142	CATAAAGTAGAAAGCACTACTAA	-2.02005	0.578185	0.555	4773.82	229	3005.48	15937.7	1157.87	2517.35	5795.53
miR-486-3p	miR-486-3p	CGGGGCAGCTCAGTACAGGATA	-2.18707	0.609513	0.591	89.2291	2	3.9966	376.293	1.2112	19.0502	132.823
miR-340-3p	miR-340*	TCCGTCTCAGTTACTTTATAGCC	-2.51235	0.49153	0.456	108.432	13	59.9497	409.635	12.1116	76.201	79.6941
miR-15b-3p	miR-15b*	CGAATCATTATTTGCTGCTCTA	-2.35172	0.502772	0.471	175.772	9	127.893	619.216	10.9005	141.516	146.106
miR-499a-5p	miR-499a	TTAAGACTTGCAGTGATGTTTA	2.29458	0.351237	0.301	37.1005	7	18.651	26.1976	1.2112	54.4293	115.114
miR-1285-3p	miR-1285	TCTGGGCAACAAATTGAGACC	-2.49006	0.478676	0.441	31.3129	1	11.9899	138.133	10.9005	25.8539	0
miR-652-5p	mir-652	ACAACCCTAGGAGAGGGTGCCATT	-2.01411	0.439287	0.397	22.1692	3	15.9866	83.3561	2.4223	14.9681	13.2823
miR-340-5p	mir-340	TTATAAAGCAATGAGACTGATTG	-2.23846	0.55456	0.528	2107.73	539	739.38	7478.23	273.723	1340.32	2275.71
miR-409-3p	mir-409	CGAATGTTGCTCGGTGAACCCCTTT	-2.17114	0.260176	0.212	546.396	639	355.702	1264.63	196.208	435.434	387.402
miR-548aq-3p	mir-548aq	CAAAAACTGCAATTACTTTTGC	-2.51382	0.537362	-	57.9911	2	9.3255	254.831	6.0558	38.1005	37.6333
miR-183-5p	miR-183	TATGGCACTGGTAGAATTCACTGT	2.34796	0.393842	0.376	1268.52	333	1693.25	231.015	1391.62	3546.07	416.18
miR-889-3p	mir-889	TTAATATCGGACAACCATTGTT	-2.05836	0.375727	0.337	53.9005	53	21.3154	157.186	9.6893	31.2968	50.9157
miR-29a-3p	miR-29a	CTAGCACCATCTGAAATCGGTTA	-2.01152	0.488754	0.462	305.439	19	339.715	878.811	39.9683	293.918	261.219
miR-410-3p	miR-410	AATATAACACAGATGGCCTGT	-2.62744	0.374969	-	169.485	90	123.896	540.624	60.5581	108.859	92.9764
miR-590-3p	mir-590	TAATTTTATGTATAAGCTGGTCT	-2.65257	0.483868	0.447	131.343	9	81.2651	500.136	15.7451	108.859	73.0529
miR-22-3p	miR-22	AAGCTGCCAGTTGAAGAACTGTTG	-2.0449	0.580593	0.556	38743.2	2976	21331.4	131822	7515.26	42460.3	26354.4
